# Supplementary material for: Composite nanofiltration membranes via the co-deposition and cross-linking of catechol/polyethylenimine
Source: Royal Society of Chemistry journal article supplement (doi:10.1039/c6ra04074h), 2016-01-01
Supplement: c6ra04074h1.pdf [file c6ra04074h1.pdf]

## Supporting Information

### Composite Nanofiltration Membranes via the Co-deposition and Cross-linking of Catechol/Polyethylenimine

Wen-Ze Qiu<sup>a,b</sup>, Yan Lv<sup>a,b</sup>, Yong Du<sup>a,b</sup>, Hao-Cheng Yang<sup>a,b</sup>, Zhi-Kang Xu<sup>a,b\*</sup>

---

<sup>a</sup>MOE Key Laboratory of Macromolecular Synthesis and Functionalization,  
Department of Polymer Science and Engineering, Zhejiang University, Hangzhou  
310027, China

<sup>b</sup>Key Laboratory of Adsorption and Separation Materials & Technologies of Zhejiang  
Province, Hangzhou, 310027, China.

---

\* Corresponding author. E-mail: [xuzk@zju.edu.cn](mailto:xuzk@zju.edu.cn); fax: + 86 571 8795 1773.

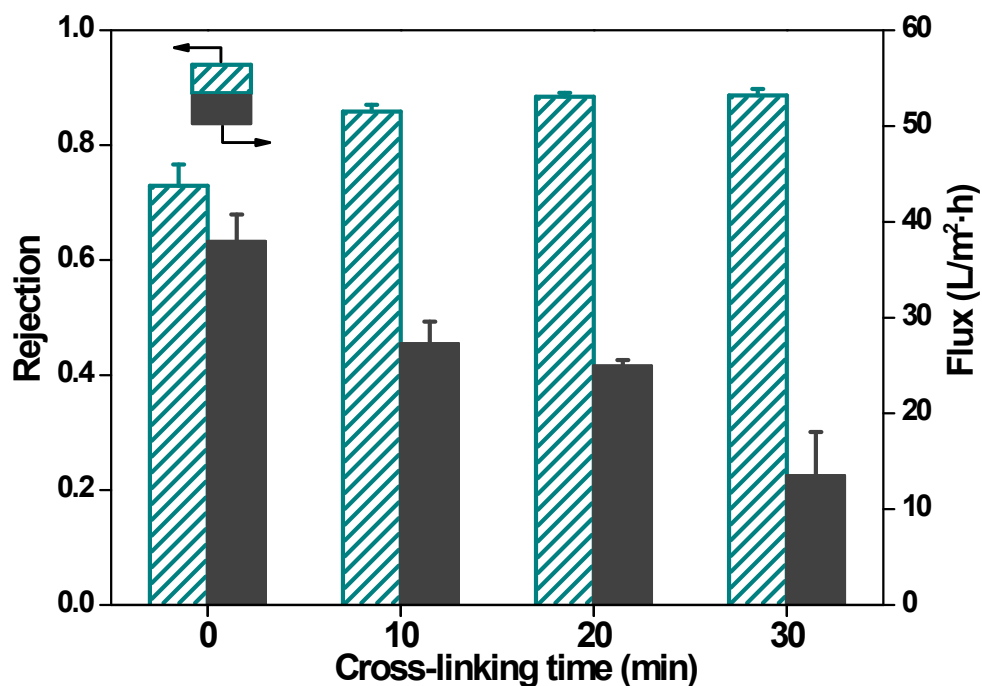

**Fig. S1.** Influence of cross-linking time on the NF performance of cross-linked composite membranes. Preparation conditions: CCh/PEI = 4:1, deposition time = 4 h, post-treatment time = 20 min; Test conditions: MgCl<sub>2</sub> concentration = 1000 mg/L, pH = 6.0, 25 °C, 0.6 MPa, cross-flow rate = 30 L/h.

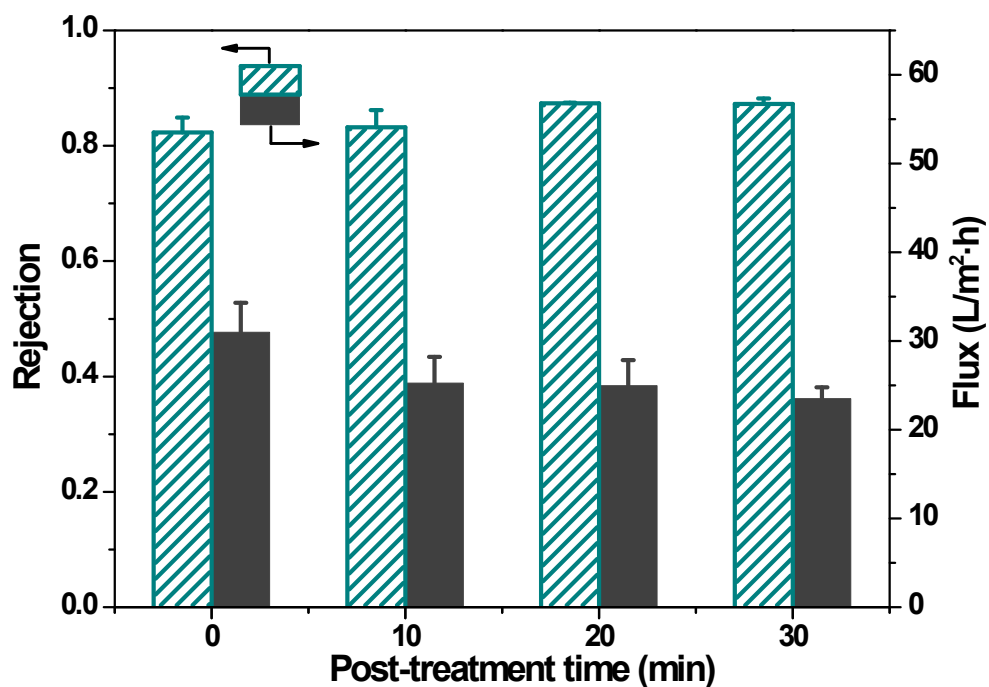

**Fig. S2.** Influence of and post-treatment time on the NF performance of cross-linked composite membranes. Preparation conditions: CCh/PEI = 4:1, deposition time = 4 h, cross-linking time = 20 min; Test conditions: MgCl<sub>2</sub> concentration = 1000 mg/L, pH = 6.0, 25 °C, 0.6 MPa, cross-flow rate = 30 L/h.

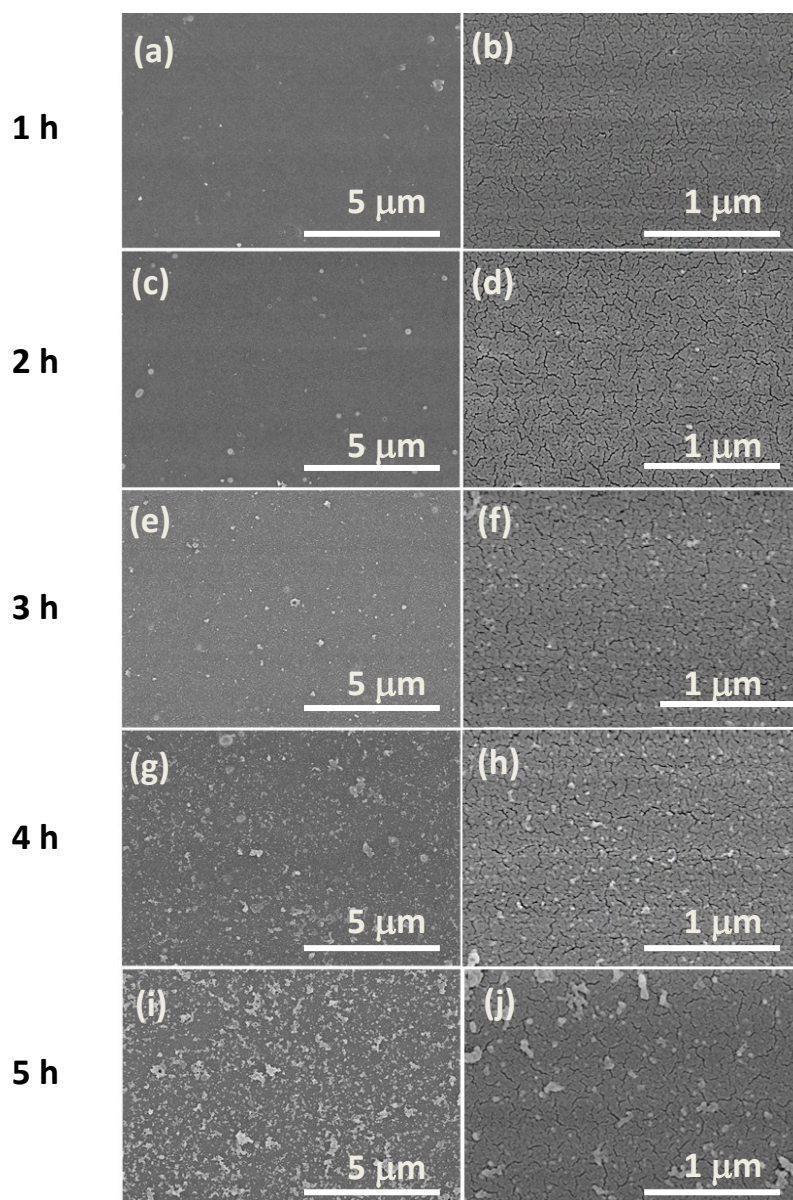

**Fig. S3.** Surface SEM images of cross-linked composite membranes with different co-deposition time (CCh/PEI = 4:1).

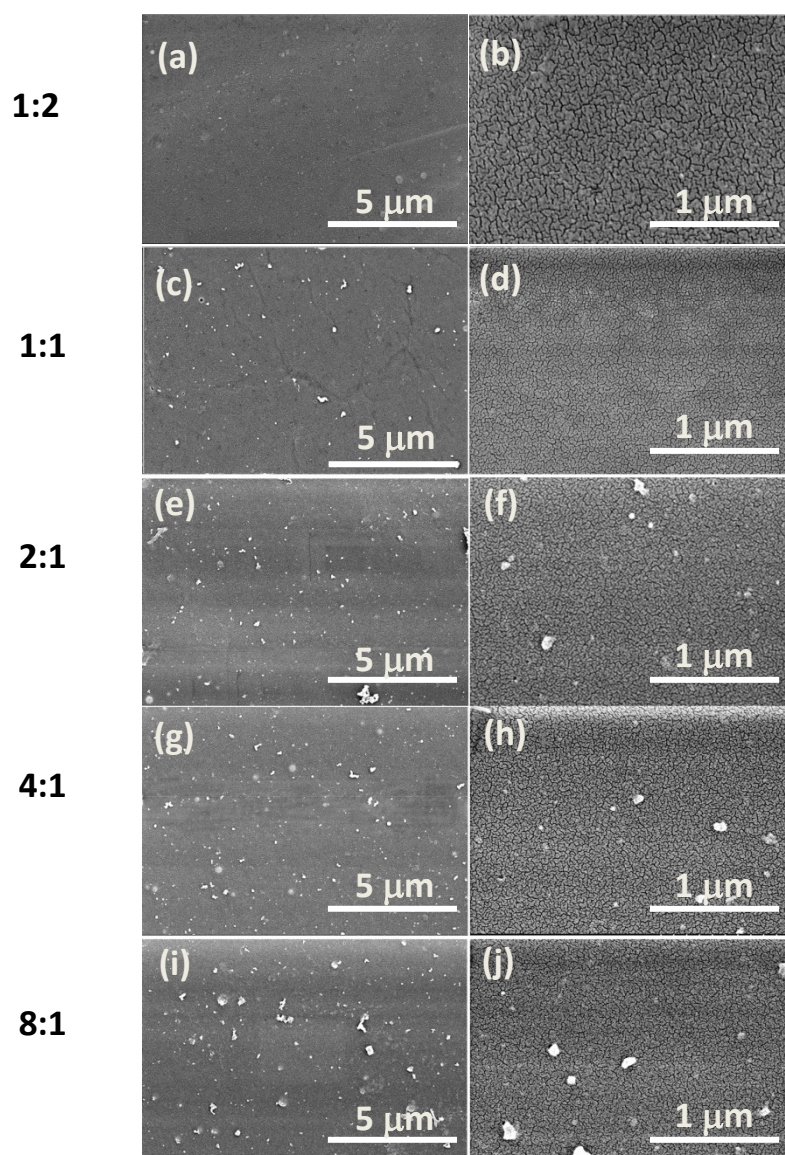

**Fig. S4.** Surface SEM images of cross-linked composite membranes with CCh/PEI mass ratios (deposition time = 4 h).

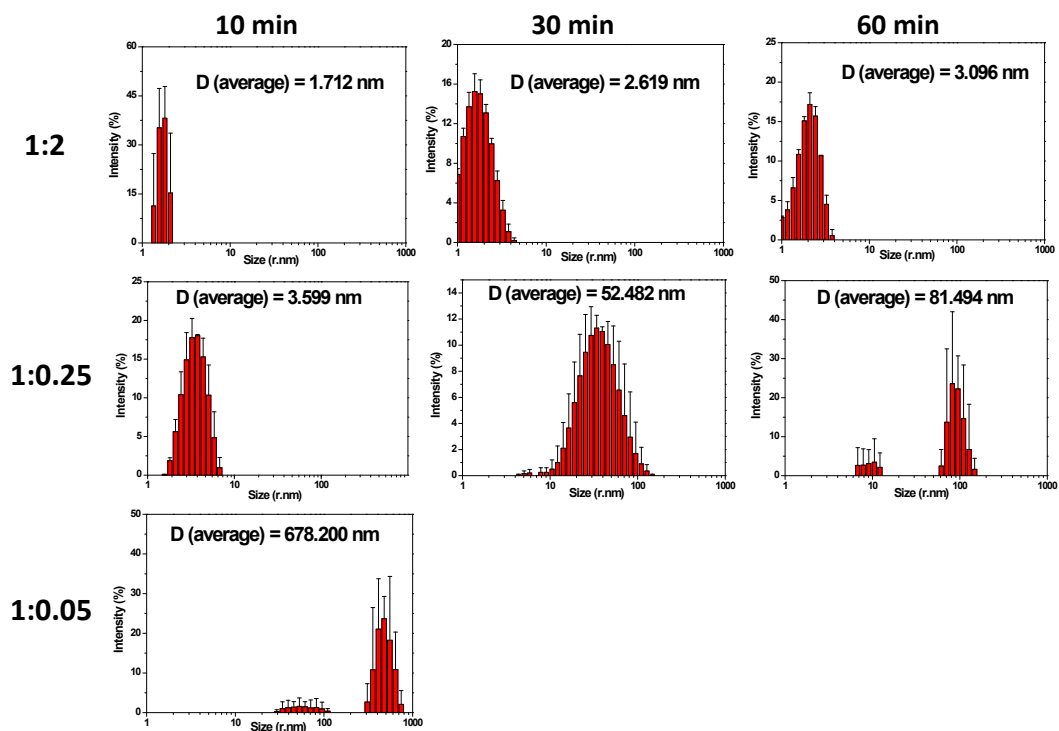

**Fig. S5.** The size distribution of CCh/PEI aggregates with time in various solutions of different CCh/PEI mass ratios: (a) 1:2, (b) 1:0.25, (c) 1:0.05. CCh = 1 mg/mL.

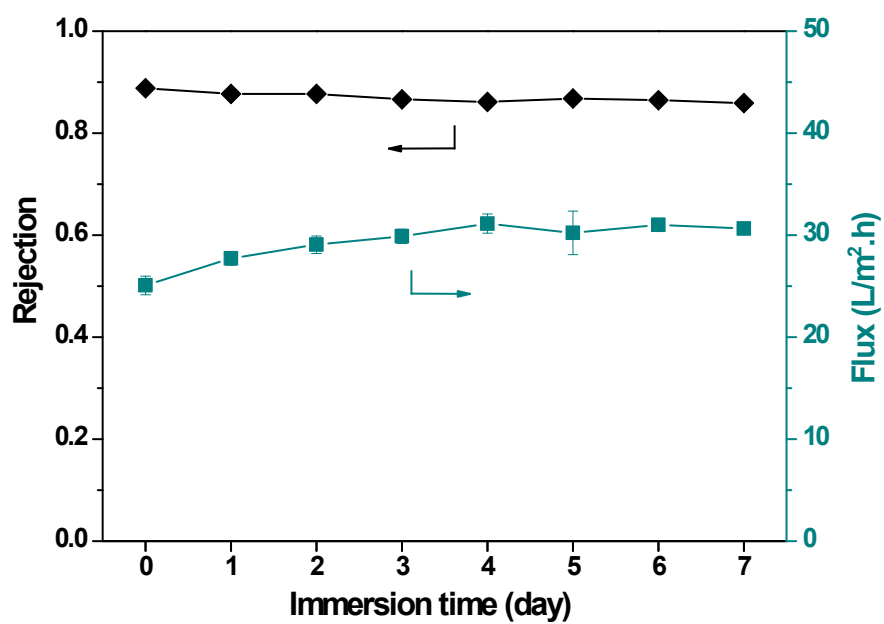

**Fig. S6** Effect of alcohol treatment on the performance of the TFC membranes. Preparation conditions: CCh/PEI = 4:1, deposition time = 4 h, cross-linking time = 20 min; Test conditions: MgCl<sub>2</sub> concentration = 1000 mg/L, pH = 6.0, 25 °C, 0.6 MPa, cross-flow rate = 30 L/h.
